# Supplementary material for: The Histone Methyltransferase DOT1L Promotes Neuroblastoma by Regulating Gene Transcription
Source: Oxford University Press journal article supplement (doi:10.1158/0008-5472.can-16-1663), 2017-02-16
Supplement: 00085472can161663-sup-167828_2_supp_3818710_3jl3ms.pdf [file 00085472can161663-sup-167828_2_supp_3818710_3jl3ms.pdf]

**Supplementary Table S2.** Multivariable Cox regression analysis of DOT1L expression in tumor tissues as a factor prognostic for outcome in 476 neuroblastoma patients\*

| Factors         | Event-free survival |                | Overall survival    |                |
|-----------------|---------------------|----------------|---------------------|----------------|
|                 | HR (95%CI)          | <i>P</i> value | HR (95%CI)          | <i>P</i> value |
| High DOT1L mRNA | 1.742 (1.324-2.292) | 7.2E-5         | 1.636 (1.171-2.286) | .004           |
| High N-Myc mRNA | 1.034 (0.937-1.140) | .508           | 1.197 (1.062-1.350) | .003           |
| Age > 18 months | 1.817 (1.245-2.651) | .002           | 4.412 (2.423-8.035) | 1.0E-6         |
| Stages 3 & 4†   | 2.460 (1.615-3.748) | 2.8E-5         | 3.196 (1.567-6.520) | 0.001          |

\* The exact values of DOT1L and N-Myc mRNA expression in all 476 tumors were employed in the multivariable Cox regression analysis. Hazard ratios were calculated as the antilogs of the regression coefficients in the proportional hazards regression. Multivariable Cox regression analysis was carried out by including the above listed four factors into the Cox regression model. *P* value was obtained using two-sided log-rank test.

† Tumor stage was classified as favorable (International Neuroblastoma Staging System stages 1, 2 and 4S) or unfavorable (International Neuroblastoma Staging System stages 3 and 4).
