# Supplementary material for: The Histone Methyltransferase DOT1L Promotes Neuroblastoma by Regulating Gene Transcription
Source: Oxford University Press journal article supplement (doi:10.1158/0008-5472.can-16-1663), 2017-02-16
Supplement: 00085472can161663-sup-167828_2_supp_3818716_yjlyn5.xlsx [file 00085472can161663-sup-167828_2_supp_3818716_yjlyn5.xlsx]

## Sheet: Supplementary Table S1
Supplementary Table S1. List of transcription factor target motifs around transcription start sites of genes down-regulated by DOT1L shRNA, as identified by gene set enrichment analysis.
Genes down-regulated by DOT1L shRNAs were identified by Affymetrix microarray in DOX-inducible control shRNA and DOT1L shRNA BE(2)-C cells after treatment with vehicle control or DOX. Transcription factor binding motifs around transcription start sites of genes down-regulated by DOT1L shRNAs, were identified by Gene Set Enrichment Analysis. Size represented the number of genes down-regulated by D…
NAME	GS<br> follow link to MSigDB	GS DETAILS	SIZE	ES	NES	NOM p-val	FDR q-val
GGGAGGRR_V$MAZ_Q6	GGGAGGRR_V$MAZ_Q6	Details ...	20	0.620783	1.80341	0	0.0272325
CAGCTG_V$AP4_Q5	CAGCTG_V$AP4_Q5	Details ...	15	0.575544	1.56915	0.0133883	0.175651
CAGGTG_V$E12_Q6	CAGGTG_V$E12_Q6	Details ...	23	0.513087	1.53186	0.0131313	0.158936
RTAAACA_V$FREAC2_01	RTAAACA_V$FREAC2_01	Details ...	12	0.55013	1.4643	0.0460733	0.208345
TTGTTT_V$FOXO4_01	TTGTTT_V$FOXO4_01	Details ...	15	0.490247	1.3698	0.0782698	0.329435
AACTTT_UNKNOWN	AACTTT_UNKNOWN	Details ...	19	0.470483	1.36296	0.0672098	0.287602
GCANCTGNY_V$MYOD_Q6	GCANCTGNY_V$MYOD_Q6	Details ...	12	0.491806	1.32698	0.103882	0.310945
CAGGTA_V$AREB6_01	CAGGTA_V$AREB6_01	Details ...	10	0.508553	1.3	0.12766	0.32341
TGGAAA_V$NFAT_Q4_01	TGGAAA_V$NFAT_Q4_01	Details ...	18	0.44106	1.26034	0.154158	0.362744
TGANTCA_V$AP1_C	TGANTCA_V$AP1_C	Details ...	12	0.449555	1.19211	0.218487	0.468174
TGACAGNY_V$MEIS1_01	TGACAGNY_V$MEIS1_01	Details ...	9	0.483163	1.18467	0.229348	0.43817
TTANTCA_UNKNOWN	TTANTCA_UNKNOWN	Details ...	12	0.4368	1.16122	0.250261	0.448095
RGAANNTTC_V$HSF1_01	RGAANNTTC_V$HSF1_01	Details ...	9	0.461701	1.14622	0.289417	0.44418
CTGCAGY_UNKNOWN	CTGCAGY_UNKNOWN	Details ...	10	0.440787	1.1247	0.313384	0.452541
CACGTG_V$MYC_Q2	CACGTG_V$MYC_Q2	Details ...	9	0.446154	1.10134	0.339827	0.465323
RYTTCCTG_V$ETS2_B	RYTTCCTG_V$ETS2_B	Details ...	10	0.430265	1.08932	0.340403	0.457242
GGGCGGR_V$SP1_Q6	GGGCGGR_V$SP1_Q6	Details ...	27	0.349875	1.06207	0.383534	0.478021
CTTTGT_V$LEF1_Q2	CTTTGT_V$LEF1_Q2	Details ...	17	0.339744	0.964579	0.539246	0.62385
GGGTGGRR_V$PAX4_03	GGGTGGRR_V$PAX4_03	Details ...	15	0.266109	0.742076	0.851197	0.930785
TAATTA_V$CHX10_01	TAATTA_V$CHX10_01	Details ...	10	0.254452	0.645772	0.924569	0.976007
CTTTAAR_UNKNOWN	CTTTAAR_UNKNOWN		10	0.226573	0.57647	0.963322	0.967274
